# Supplementary material for: Sacrificial template induced interconnected bubble-like N-doped carbon nanofoam as a pH-universal electrocatalyst for an oxygen reduction reaction
Source: Royal Society of Chemistry journal article supplement (doi:10.1039/c8qi01271g), 2019-01-01
Supplement: c8qi01271g1.pdf [file c8qi01271g1.pdf]

**Supporting information** *for*

Sacrificial Template Induced Interconnected Bubble-like N-doped  
Carbon Nanofoam as a PH-universal Electrocatalysts for Oxygen  
Reduction Reaction

Table S1 precursor species and their corresponding components

| Precursor | Zinc nitrate hexahydrate<br>(g/600mL water) | Glucose (g/600mL water) |
|-----------|---------------------------------------------|-------------------------|
| <b>a</b>  | 18                                          | 22.8                    |
| <b>b</b>  | 8.925                                       | 11.4                    |
| <b>c</b>  | 1                                           | 1.28                    |

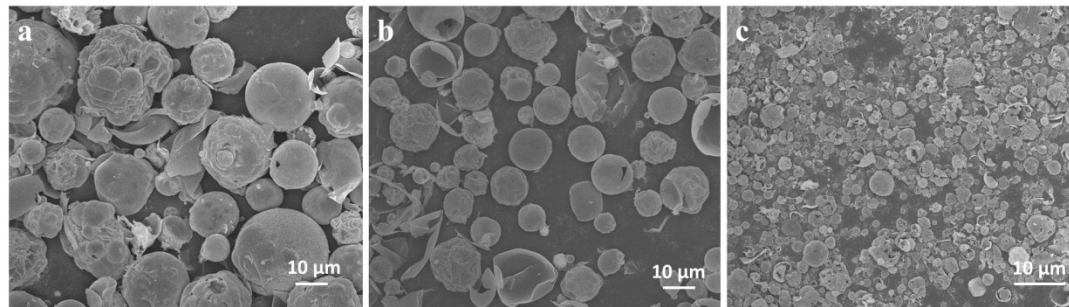

Fig. S1 SEM images of sphere-like carbon materials derived from precursor a (a), b (b) and c (c).

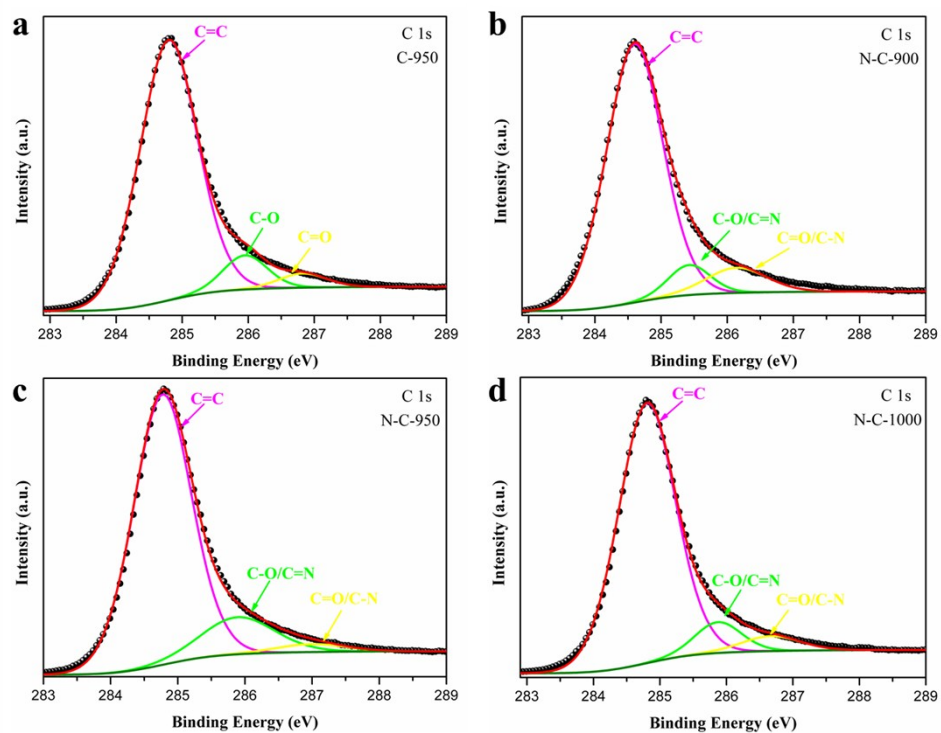

Fig. S2 High resolution C 1s spectra of C-950 (a), N-C-900 (b), N-C-950 (c) and N-C-1000 (d).

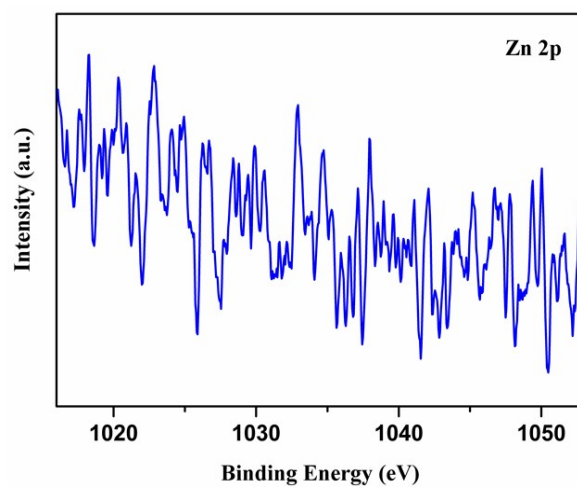

Fig. S3 High resolution Zn 2p XPS spectrum of N-C-950.

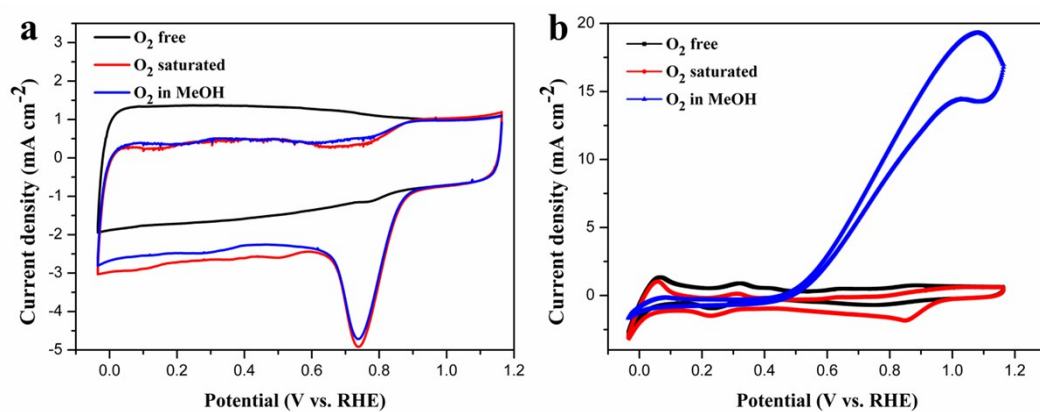

Fig. S4 CV curves of N-C-950 (a) and Pt/C (b) measured in three different solutions.

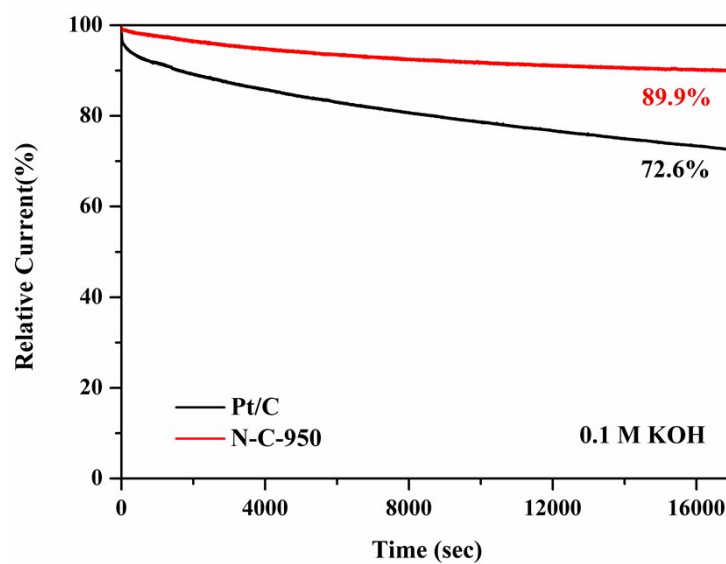

Fig. S5 Chronoamperometric curves of a glassy carbon electrode modified with N-C-950 and Pt/C at -0.30 V vs. Ag/AgCl in an O<sub>2</sub>-saturated 0.1 M KOH solution at a rotation rate of 1600 rpm.

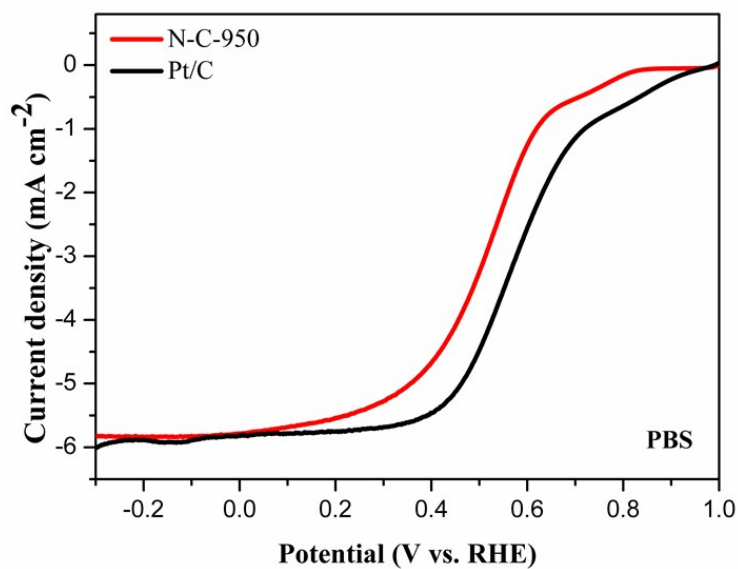

Fig.S6 LSV curves of N-C-950 and Pt/C measured in O<sub>2</sub>-saturated PBS solution at a rotation speed of 1600 rpm with a scan rate of 5 mV s<sup>-1</sup>.

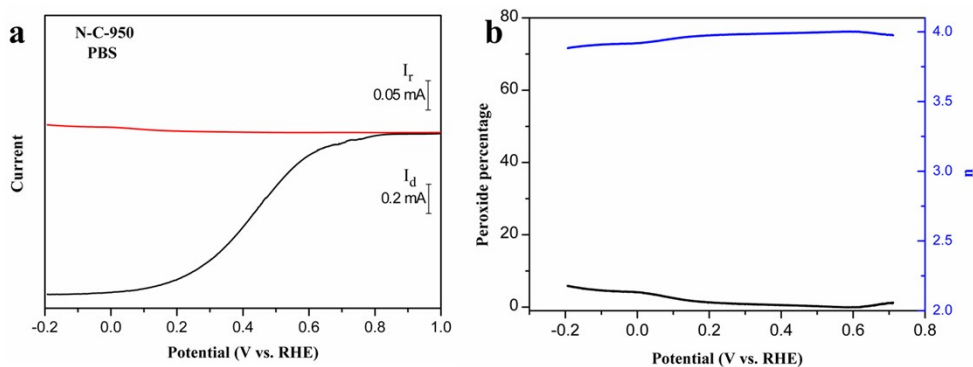

Fig.S7 a. RRDE voltammograms in O<sub>2</sub>-saturated PBS solution at room temperature at a rotation speed of 1600 rpm with a scan rate of 5mV s<sup>-1</sup> for N-C-950; b. the electron transfer number and hydrogen peroxide yield obtained from the RRDE curves for N-C-950.

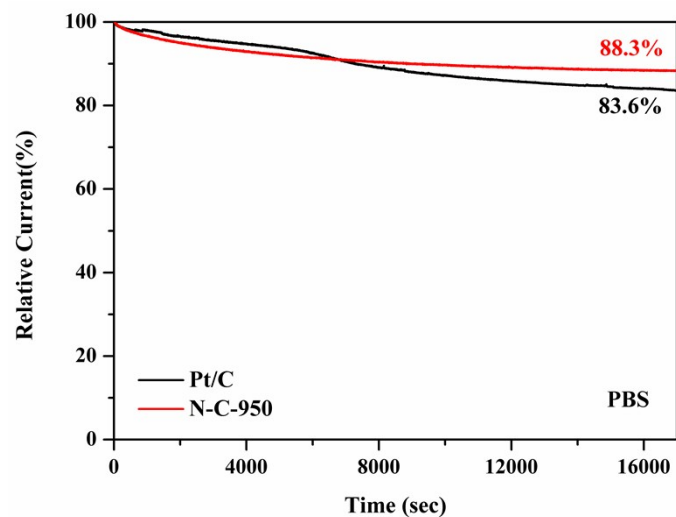

Fig. S8 Chronoamperometric curves of a glassy carbon electrode modified with N-C-950 and Pt/C, respectively, at -0.25 V vs Ag/AgCl in O<sub>2</sub>-saturated 0.1 M PBS solution at a rotation rate of 1600 rpm.

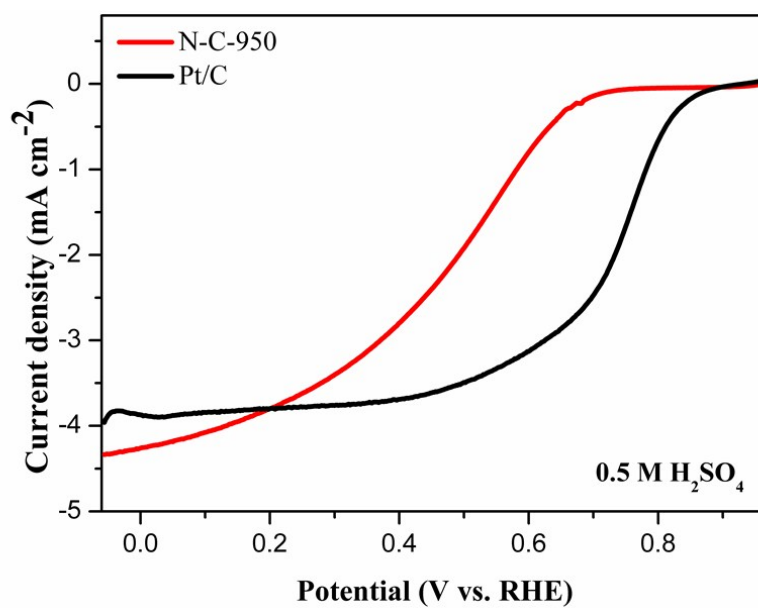

Fig.S9 LSV curves of N-C-950 and Pt/C measured in O<sub>2</sub>-saturated 0.5 M H<sub>2</sub>SO<sub>4</sub> solution at a rotation speed of 1600 rpm with a scan rate of 5 mV s<sup>-1</sup>.

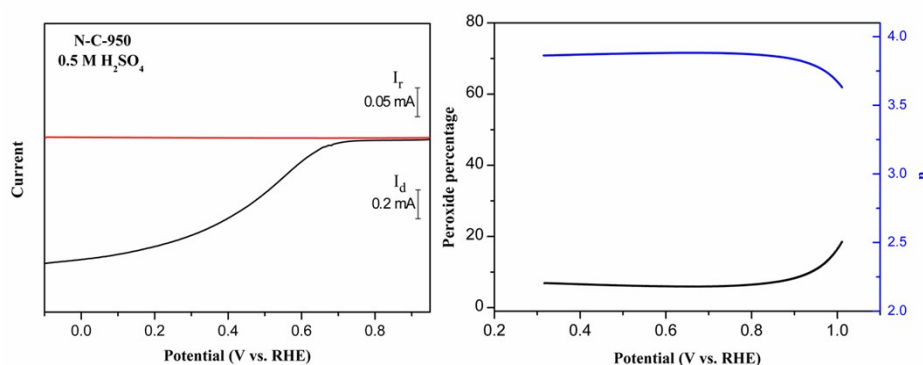

Fig.S10 a. RRDE voltammograms in O<sub>2</sub>-saturated 0.5 M H<sub>2</sub>SO<sub>4</sub> solution at room temperature at a rotation speed of 1600 rpm with a scan rate of 5mV s<sup>-1</sup> for N-C-950; b. the electron transfer number and hydrogen peroxide yield obtained from the RRDE curves for N-C-950.

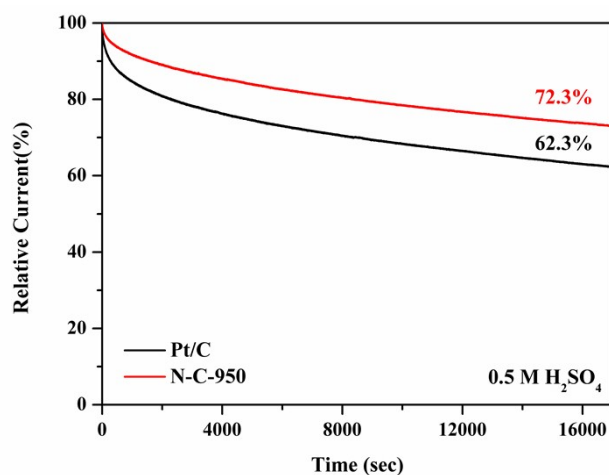

Fig. S11 Chronoamperometric curves of a glassy carbon electrode modified with N-C-950 and Pt/C, respectively, at -0.25 V vs Ag/AgCl in O<sub>2</sub>-saturated 0.5 M H<sub>2</sub>SO<sub>4</sub> solution at a rotation rate of 1600 rpm.

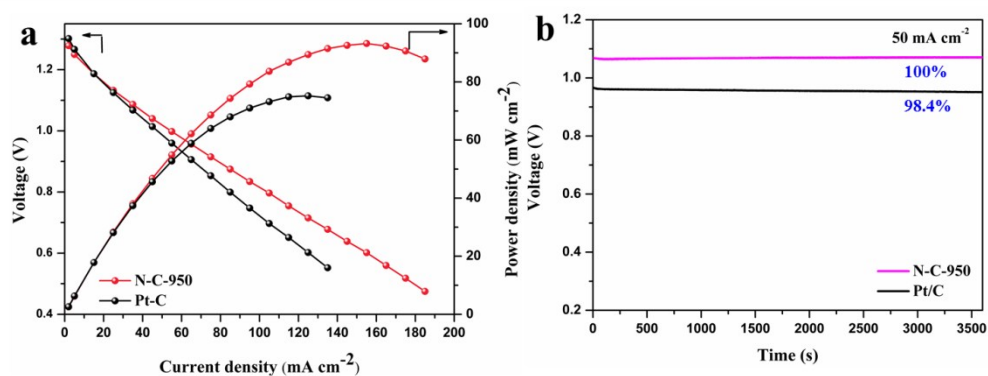

Fig. S12 (a) Voltage and power density tendencies with increasing current densities; (b) Discharge curves of the as-prepared N-C-950 and Pt/C at a current density of 50 mA cm<sup>-2</sup>.

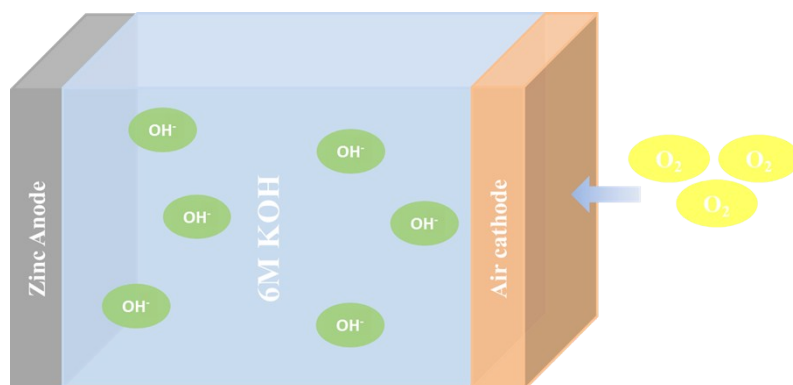

Scheme S1. Schematic of Zn-air battery configuration.
